# Supplementary material for: Unusual thermoelectric properties mediated by solute segregation in tellurium alloyed CoSbS
Source: Royal Society of Chemistry journal article supplement (doi:10.1039/d2ta02147a), 2022-01-01
Supplement: d2ta02147a1.pdf [file d2ta02147a1.pdf]

## Supporting Information for

### Unusual Thermoelectric Properties Mediated by Solute Segregation in Tellurium Alloyed CoSbS

Weihong Gao<sup>a</sup>, Yuxi Yang<sup>a</sup>, Mingqi Deng<sup>a</sup>, Bin Sun<sup>b</sup>, Yudong Fu<sup>a\*</sup>, Xiang Wei<sup>a</sup>,  
Yixuan Li<sup>a</sup>, Zihang Liu<sup>c\*</sup>, and Jiehe Sui<sup>c\*</sup>

<sup>a</sup> College of Materials Science and Chemical engineering, Harbin Engineering University, Harbin 150001, China

<sup>b</sup> Center of Testing and Analysis, College of Materials Science and Chemical Engineering, Harbin 150001, China

<sup>c</sup> State Key Laboratory of Advanced Welding and Joining, Harbin Institute of Technology, Harbin 150001, China

To whom correspondence should be addressed. E-mail: fuyudong@hrbeu.edu.cn, zihangliu@hit.edu.cn, suijiehe@hit.edu.cn

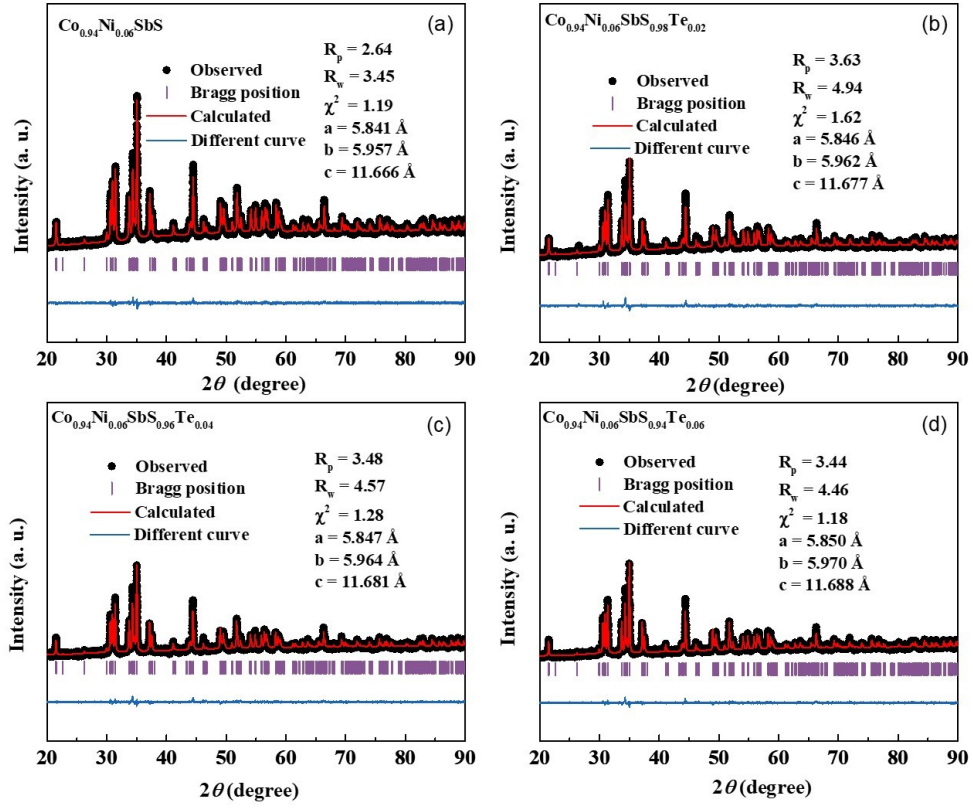

Figure S1. (a)-(d) XRD refinement result of  $\text{Co}_{0.94}\text{Ni}_{0.06}\text{SbS}_{1-x}\text{Te}_x$  samples ( $x = 0, 0.02, 0.04, \text{ and } 0.06$ ), respectively

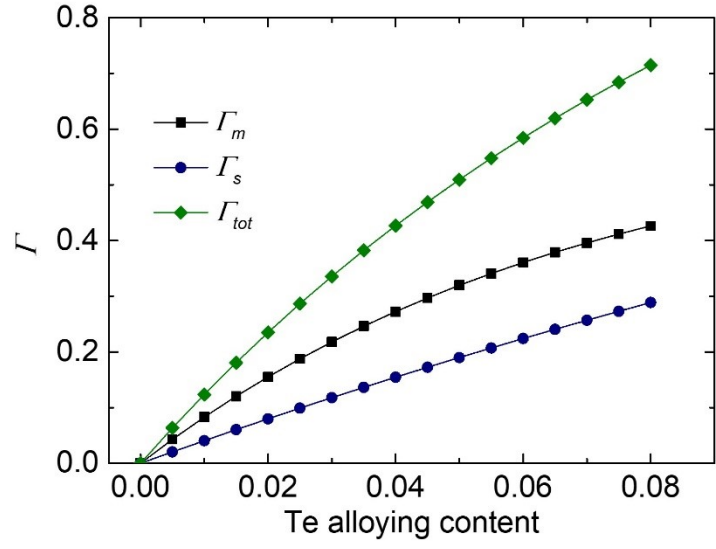

Figure S2. Comparison of the calculated imperfection scaling parameter obtained from the Callaway-Debye model, including  $\Gamma_{Tot}$ ,  $\Gamma_m$ , and  $\Gamma_s$  are the total, mass, and strain field fluctuation disorder parameters, respectively.
